# Supplementary material for: Protist Community Grazing on Prokaryotic Prey in Deep Ocean Water Masses
Source: PubMed Central journal article supplement (PMC4404134; doi:10.1371/journal.pone.0124505), 2015-04-20
Supplement: pone.0124505.s004.pdf [file pone.0124505.s004.pdf]

**S1 Table**

| <b>Station</b> | <b>Depth</b> | <b>Prokaryotes<br/>(cells·ml<sup>-1</sup>)</b> | <b>Eukaryotes<br/>(cells·ml<sup>-1</sup>)</b> | <b>Grazing rate (h<sup>-1</sup>)</b>    | <b>Grazing rate<br/>(prok·euk<sup>-1</sup> hr<sup>-1</sup>)</b> |
|----------------|--------------|------------------------------------------------|-----------------------------------------------|-----------------------------------------|-----------------------------------------------------------------|
| 2              | DCM          | $2.68 \times 10^5 \pm 4.56 \times 10^4$        | 1252                                          | $4.23 \times 10^4 \pm 2.45 \times 10^4$ | $6.07 \pm 3.51$                                                 |
|                | 220m         | $1.04 \times 10^5 \pm 7.35 \times 10^3$        | 249                                           | $8.1 \times 10^3 \pm 7.46 \times 10^3$  | $5.41 \pm 4.98$                                                 |
|                | AAIW         | $1.78 \times 10^5 \pm 2.2 \times 10^4$         | 153                                           | $5.78 \times 10^3 \pm 5.92 \times 10^3$ | $4.15 \pm 4.25$                                                 |
|                | NADW         | $3.16 \times 10^4 \pm 1.34 \times 10^2$        | 113                                           | $5.45 \times 10^3 \pm 1.85 \times 10^3$ | $9.02 \pm 3.06$                                                 |
| 7              | DCM          | $7.24 \times 10^5 \pm 1.41 \times 10^3$        | 490                                           | $6.62 \times 10^4 \pm 2.39 \times 10^3$ | $13.52 \pm 0.49$                                                |
|                | 220m         | $1.91 \times 10^5 \pm 3.85 \times 10^4$        | 199                                           | $1.97 \times 10^4 \pm 5.33 \times 10^3$ | $14.05 \pm 3.8$                                                 |
|                | AAIW         | $8.7 \times 10^4 \pm 2.83 \times 10^3$         | 74                                            | $1.09 \times 10^4 \pm 6.49 \times 10^3$ | $20.89 \pm 12.45$                                               |
|                | NADW         | $3.78 \times 10^4 \pm 3.96 \times 10^3$        | 49                                            | $3.47 \times 10^3 \pm 1.0 \times 10^3$  | $10.03 \pm 2.9$                                                 |
| 23             | DCM          | $4.05 \times 10^5 \pm 9.2 \times 10^2$         | 505                                           | $1.15 \times 10^5 \pm 1.98 \times 10^4$ | $24.04 \pm 4.13$                                                |
|                | 220m         | $1.41 \times 10^5 \pm 4.34 \times 10^3$        | 155                                           | $3.89 \times 10^4 \pm 1.62 \times 10^4$ | $27.48 \pm 11.45$                                               |
|                | AAIW         | $4.92 \times 10^4 \pm 7.35 \times 10^3$        | 91                                            | $1.53 \times 10^4 \pm 1.72 \times 10^3$ | $24.93 \pm 2.8$                                                 |
|                | NADW         | $3.82 \times 10^4 \pm 1.38 \times 10^4$        | 61                                            | $1.36 \times 10^3 \pm 1.0 \times 10^3$  | $3.86 \pm 2.84$                                                 |
